# Supplementary material for: Crocodile defensin (CpoBD13) antifungal activity via pH-dependent phospholipid targeting and membrane disruption
Source: PubMed Central journal article supplement (PMC9977887; doi:10.1038/s41467-023-36280-y), 2023-03-01
Supplement: 41467_2023_36280_MOESM1_ESM.pdf [file 41467_2023_36280_MOESM1_ESM.pdf]

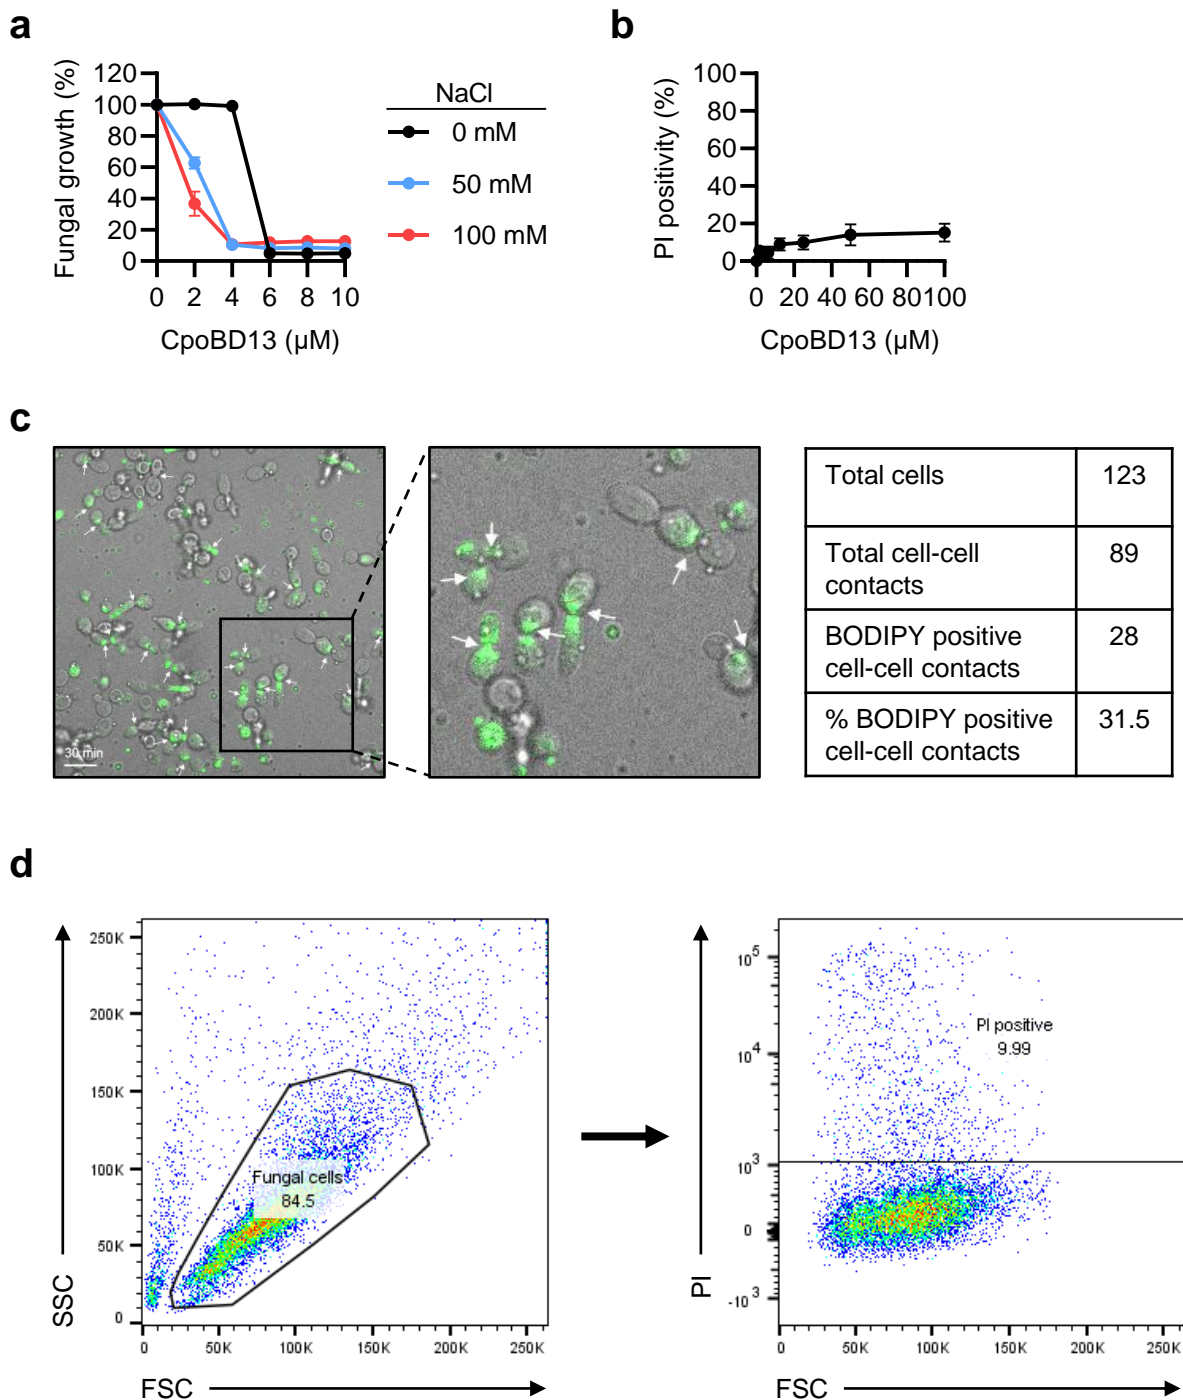

**Supplementary Fig. 1.** **a** Fungal growth inhibition of *C. albicans* treated with a range of CpoBD13 in various concentrations of NaCl over 24 h. Data represents mean  $\pm$  SEM,  $n=3$ . **b** Membrane permeabilisation of mammalian U937 cells treated with a range of CpoBD13 concentrations in serum-free medium over 30 min as determined by the uptake of propidium iodide. Data represents mean  $\pm$  SEM,  $n=3$ . **c** Quantification of CpoBD13-BODIPY accumulation at *C. albicans* cell to cell contact points as observed in Fig. 1i and Supplementary Movie 1. **d** Example propidium iodide uptake assay gating strategy. **a** & **b** Source data are provided as a Source Data file.

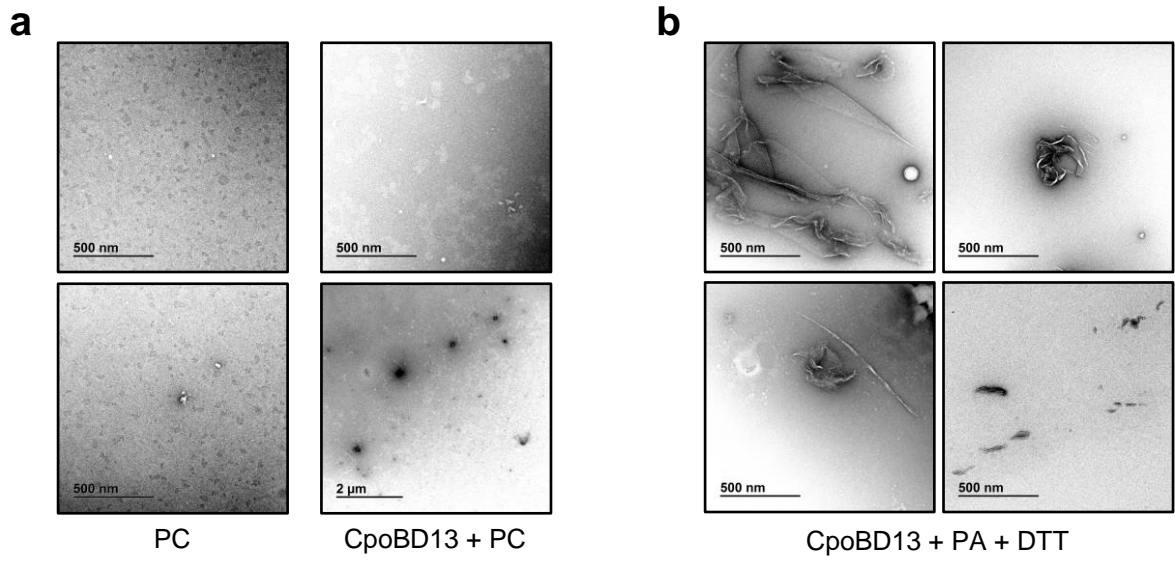

**Supplementary Fig. 2.** **a** TEM images of PC alone and CpoBD13 incubated with PC. **b** TEM images of CpoBD13-PA complexes produced in the presence of the reducing agent dithiothreitol (DTT). Images in **a** & **b** are representative fields of one independent experiment.

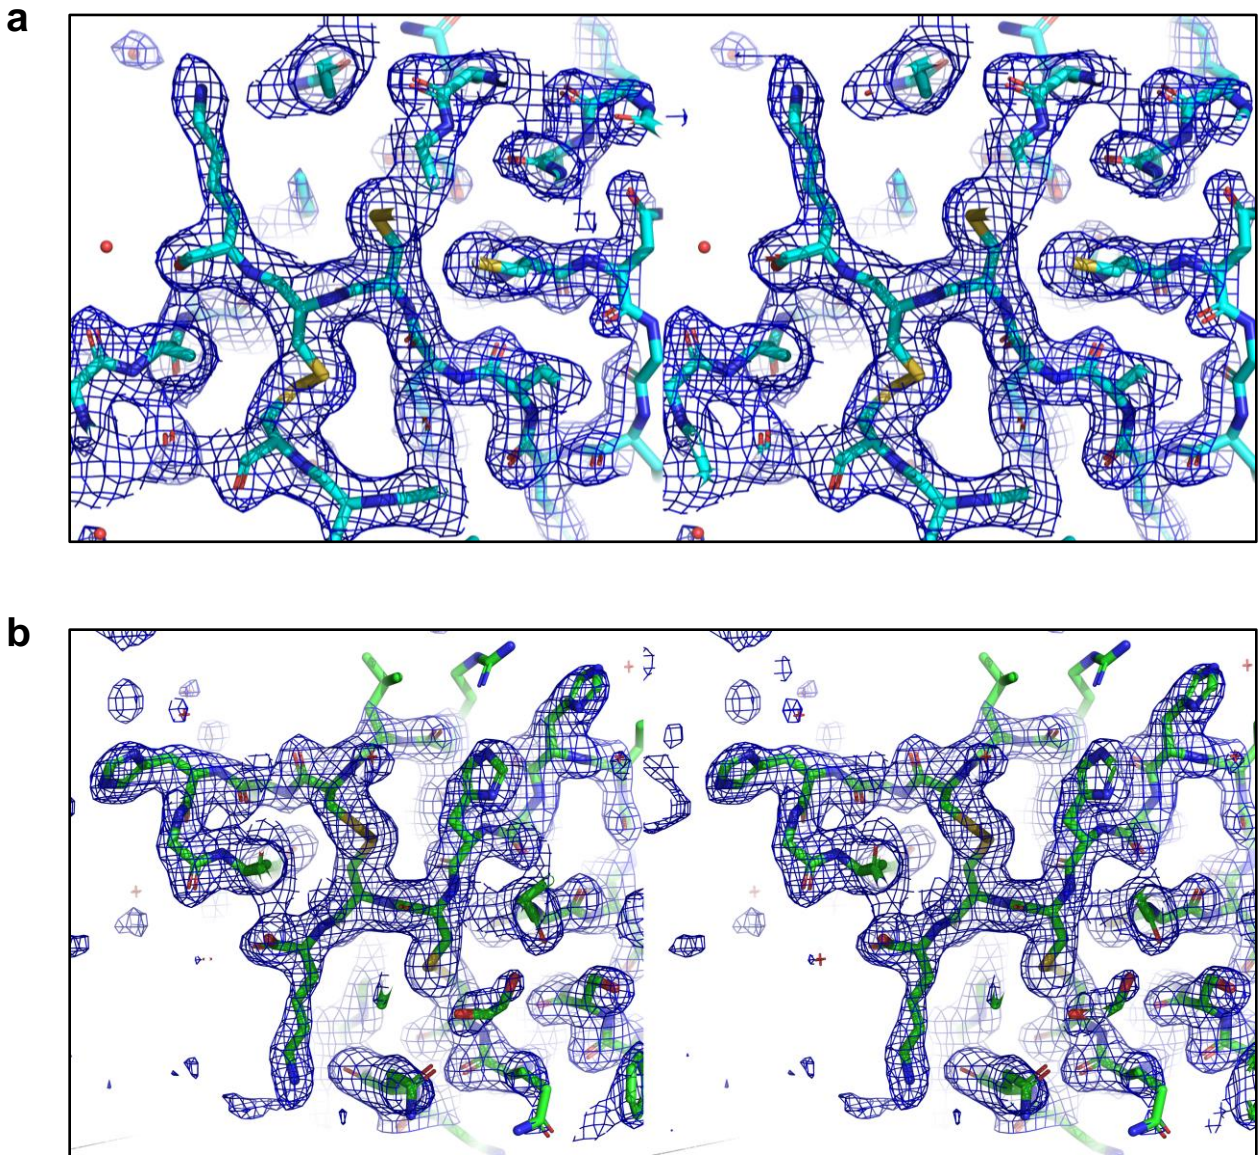

**Supplementary Fig. 3.** Electron density map of a representative section of **a** CpoBD13 (shown as cyan sticks) and **b** the CpoBD13:PA complex (shown as green sticks). Maps are a 2Fo-Fc map contoured at 1  $\sigma$  shown as blue mesh. Wall-eye stereo representation.

**Supplementary Table 1.**

Crystallographic data collection and refinement statistics of CpoBD13 and CpoBD13:PA

|                                          | CpoBD13                | CpoBD13:PA             |
|------------------------------------------|------------------------|------------------------|
| <b>Data collection</b>                   |                        |                        |
| Space group                              | C222 <sub>1</sub>      | P1                     |
| Cell dimensions                          |                        |                        |
| <i>a</i> , <i>b</i> , <i>c</i> (Å)       | 46.70, 56.42, 33.10    | 27.06, 33.69, 36.64    |
| $\alpha$ , $\beta$ , $\gamma$ (°)        | 90.00, 90.00, 90.00    | 90.09, 90.02, 90.01    |
| Wavelength (Å)                           | 0.9537                 | 0.9537                 |
| Resolution (Å)*                          | 19.08-1.8 (1.865-1.80) | 24.82-1.45 (1.48-1.45) |
| $R_{\text{sym}}$ or $R_{\text{merge}}$ * | 0.085 (0.521)          | 0.096 (0.922)          |
| $I / \sigma I$ *                         | 4.2 (1.1)              | 6.5 (2.0)              |
| Completeness (%)*                        | 98.0 (99.3)            | 93.0 (90.3)            |
| Redundancy*                              | 2.7 (2.8)              | 2.5 (2.5)              |
| CC(1/2)                                  | 0.995 (0.461)          | 0.990 (0.416)          |
| <b>Refinement</b>                        |                        |                        |
| Resolution (Å)                           | 19.08-1.8              | 24.78-1.45             |
| No. reflections                          | 4149                   | 21266                  |
| $R_{\text{work}} / R_{\text{free}}$      | 0.227/0.253            | 0.194/0.215            |
| No. atoms                                |                        |                        |
| Protein                                  | 316                    | 1274                   |
| Ligand/ion                               | 19                     | 101                    |
| Water                                    | 22                     | 130                    |
| <i>B</i> -factors                        |                        |                        |
| Protein                                  | 37.7                   | 15.0                   |
| Ligand/ion                               | 58.0                   | 35.0                   |
| Water                                    | 48.6                   | 23.9                   |
| R.m.s. deviations                        |                        |                        |
| Bond lengths (Å)                         | 1.18                   | 1.06                   |
| Bond angles (°)                          | 0.011                  | 0.006                  |
| Molprobity score                         | 1.46                   | 1.55                   |

\*Values in parentheses are for highest-resolution shell.
