# Supplementary material for: Crocodile defensin (CpoBD13) antifungal activity via pH-dependent phospholipid targeting and membrane disruption
Source: PubMed Central journal article supplement (PMC9977887; doi:10.1038/s41467-023-36280-y), 2023-03-01
Supplement: 41467_2023_36280_MOESM2_ESM.pdf [file 41467_2023_36280_MOESM2_ESM.pdf]

### **Description of Additional Supplementary Files**

File Name: Supplementary Movie 1

Description: Live microscopy of the accumulation of CpoBD13-BODIPY (20  $\mu$ M, green) at the plasma membrane of *C. albicans* cells. Arrows indicate cell to cell contact points where CpoBD13-BODIPY accumulation is present. Scale bar represents 10  $\mu$ m.
